# Supplementary material for: Factors Associated with Response to Systemic Corticosteroids in Active Ulcerative Colitis: Results from a Prospective, Multicenter Trial
Source: MDPI journal article supplement (doi:10.3390/jcm12144853), 2023-07-24
Supplement: s1 [file s1]

**Supp. Table S1. Excluded patients.** Seven patients with clinical improvement to corticosteroids received additional biologics between baseline and week 4. Displayed are types of drugs and reasons for initiation of these drugs in the individual patients. At week 4, these patients were classified according to their actual biochemical and clinical score values.

| Patient    | Drug       | Reasons for initiation                                                                                                      | Lichtiger Response at week 4 |
|------------|------------|-----------------------------------------------------------------------------------------------------------------------------|------------------------------|
| Patient 8  | Infliximab | Initiation of biologic despite clinical improvement to corticosteroids                                                      | Non-response                 |
| Patient 12 | Infliximab | Response to corticosteroids, planned initiation of additional biologic due to high disease activity at baseline             | Response                     |
| Patient 24 | Infliximab | Initiation of biologic despite clinical improvement to corticosteroids                                                      | Non-response                 |
| Patient 26 | Infliximab | Initiation of biologic despite clinical improvement to corticosteroids                                                      | Non-response                 |
| Patient 77 | Golimumab  | Clinical improvement to corticosteroids, planned initiation of additional biologic due to high disease activity at baseline | Non-response                 |
| Patient 85 | Infliximab | Response to corticosteroids, planned initiation of additional biologic due to high disease activity at baseline             | Response                     |
| Patient 91 | Infliximab | Response to corticosteroids, additional initiation of biologic due to extraintestinal manifestations (arthralgia)           | Response                     |

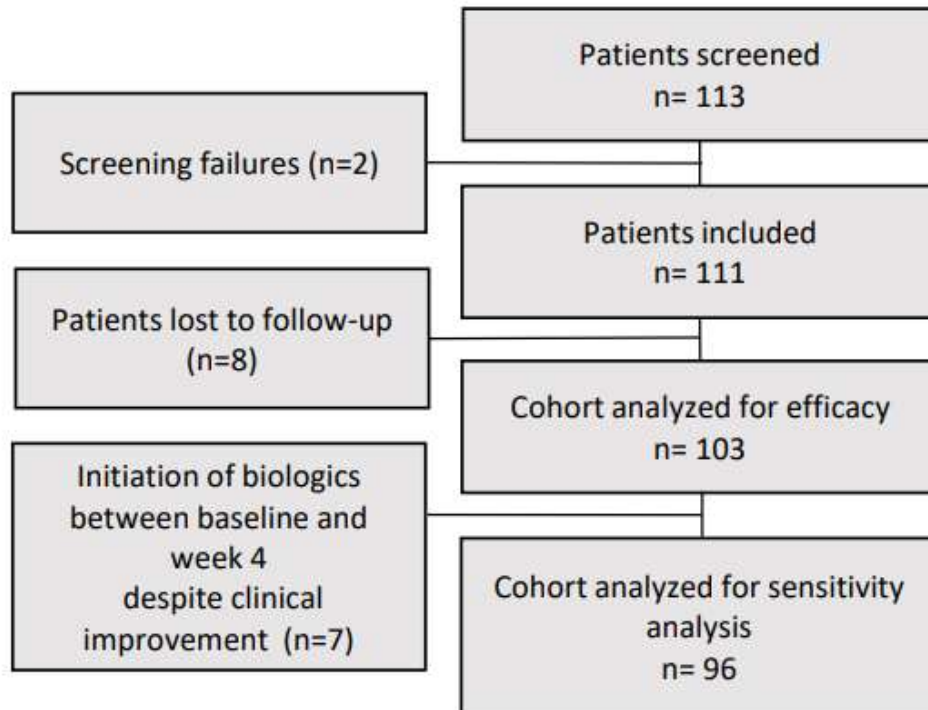

**Supp. Figure S1. Flow chart** of recruited and subsequently excluded and included study subjects. 113 patients were screened for the study, 2 patients were screening failures and 8 patients were lost to follow-up. Therefore, 103 patients were included in the main efficacy analysis. 7 patients with clinical improvement to corticosteroids received additional biologics between baseline and week 4 and were consequently excluded in the sensitivity analysis.

**Supp. Table S2. Characteristics** of included patients in the main efficacy analysis (n=103) and the sensitivity analysis (n=96) at baseline. Data are shown as median (range) or n (%).

|                                             | Main cohort<br>(n=103) | Sensitivity analysis cohort<br>(n=96) |
|---------------------------------------------|------------------------|---------------------------------------|
| Age (years)                                 | 38 (20, 82)            | 39 (20, 82)                           |
| Female sex                                  | 45 (44)                | 45 (47)                               |
| Body mass index                             | 23.8 (16.6, 36.8)      | 23.8 (16.6, 34.8)                     |
| Disease duration at study inclusion (years) | 4 (0, 59)              | 4 (0, 59)                             |
| Disease extent/Montreal classification      |                        |                                       |
| E1                                          | 11 (11)                | 10 (11)                               |
| E2                                          | 42 (41)                | 40 (42)                               |
| E3                                          | 49 (48)                | 45 (47)                               |
| Unknown                                     | 1                      | 1                                     |
| Severely active colitis                     | 48 (47)                | 43 (45)                               |
| Hospitalisation                             | 41 (41)                | 35 (38)                               |
| Active smoking                              | 9 (9)                  | 8 (9)                                 |
| Past smoking                                | 54 (55)                | 50 (54)                               |
| Concomitant biologics                       | 18 (17)                | 18 (19)                               |
| Concomitant immunomodulators                | 7 (7)                  | 7 (7)                                 |
| Concomitant oral 5-ASA                      | 76 (74)                | 71 (74)                               |
| Prior use of corticosteroids steroids       | 45 (44)                | 43 (45)                               |
| Hemoglobin (g/dL)                           | 13.5 (8.0, 17.3)       | 13.6 (8.3, 17.3)                      |
| Leukocytes (10 <sup>9</sup> /L)             | 8.0 (3.8, 23.7)        | 7.9 (3.8, 23.7)                       |
| Thrombocytes (10 <sup>9</sup> /L)           | 303 (185, 785)         | 302 (185, 785)                        |
| C-reactive protein (mg/L)                   | 13 (0, 236)            | 11 (0, 236)                           |
| Albumin (g/dL)                              | 4.1 (1.6, 5.23)        | 4.1 (1.6, 5.3)                        |
| Calprotectin (mg/kg)                        | 3905 (8, 43998)        | 3516 (8, 43998)                       |
| LCN-2 (ng/ml)                               | 147 (6, 4014)          | 143 (6, 1636)                         |
| Lichtiger score                             | 10 (5, 17)             | 10 (5, 17)                            |

Montreal classification: E1 = proctitis, E2 = left-sided colitis, E3 = pancolitis, LCN-2 = Lipocalin-2

**Supp. Table S3.** Characteristics of patients (n=103) at week 4 divided into patients with response and non-response according to Lichtiger score at week 4. Lichtiger response was defined as decrease of Lichtiger score  $\geq$  50% from baseline to week 4. Data are shown as median (range). P-values were calculated with Chi-square or Mann Whitney U test as appropriate.

|                                   | Response (n=75)   | Non-response (n=28) | p-value |
|-----------------------------------|-------------------|---------------------|---------|
| Body mass index                   | 24.0 (17.6, 35.5) | 23.5 (18.8, 36.4)   | 0.996   |
| Hemoglobin (g/dL)                 | 13.4 (6.2, 18.0)  | 12.7 (8.0, 16.4)    | 0.044   |
| Leukocytes (10 <sup>9</sup> /L)   | 9.2 (4.5, 18.2)   | 9.0 (4.7, 17.0)     | 0.832   |
| Thrombocytes (10 <sup>9</sup> /L) | 282 (150, 608)    | 297 (141, 783)      | 0.423   |
| C-reactive protein (mg/L)         | 1 (0, 103)        | 8 (0, 241)          | 0.009   |
| Albumin (g/dL)                    | 4.3 (2.8, 5.1)    | 4.0 (2.5, 4.6)      | 0.005   |
| Calprotectin (mg/kg)              | 434 (3, 5129)     | 1061 (30, 7328)     | 0.009   |
| LCN-2 (ng/ml)                     | 42 (0, 383)       | 89 (9, 892)         | 0.006   |
| Lichtiger score                   | 2 (0, 7)          | 8 (4, 13)           | <0.001  |

LCN-2 = Lipocalin-2

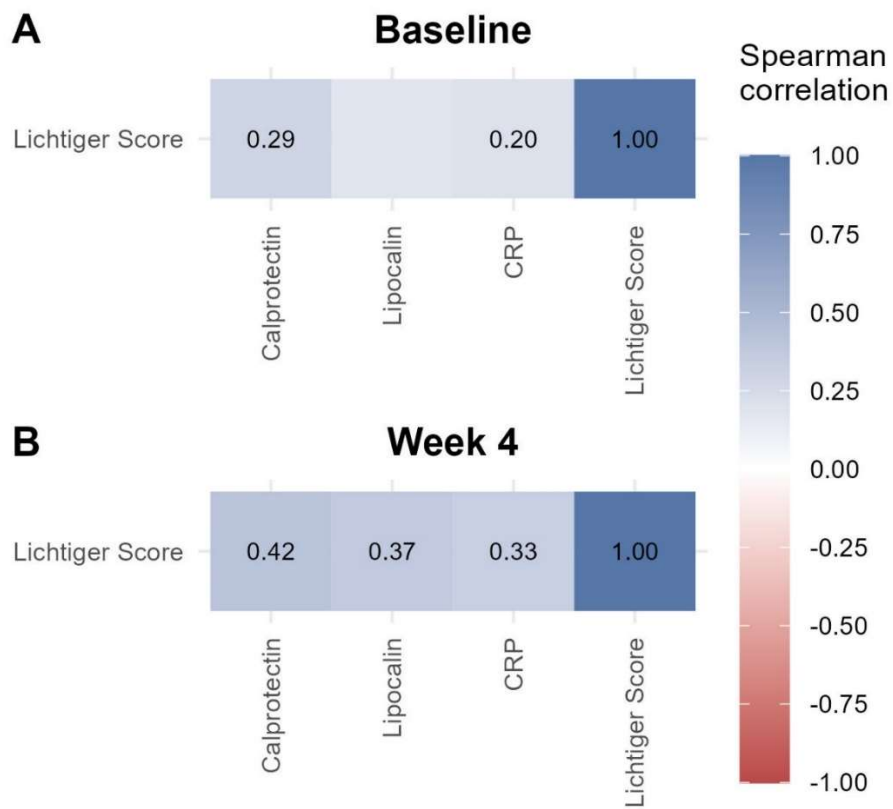

**Supp. Figure S2.** Heatmap of Spearman correlations between Lichtiger Score and biomarkers at baseline **(A)** and at week 4 **(B)**. All indicated values have a p-value <0.05.

**Supp. Table S4.** Baseline characteristics of patients (n=87) divided into patients with steroid dependence and without steroid dependence at month 3. Steroid dependence was defined as patients unable to reduce corticosteroids below the equivalent of prednisolone 10 mg/day or as recurrent active disease after stopping steroids. Data are shown as median (range) or n (%). P-values were calculated with Chi-square or Mann Whitney U test as appropriate.

|                                             | No steroid dependence (n=74) | Steroid dependence (n=13) | p-value |
|---------------------------------------------|------------------------------|---------------------------|---------|
| Age (years)                                 | 42 (20, 75)                  | 33 (22, 54)               | 0.120   |
| Female sex                                  | 35 (47)                      | 5 (38)                    | 0.556   |
| Body mass index                             | 24.1 (17.2, 34.8)            | 22.8 (16.9, 36.8)         | 0.508   |
| Disease duration at study inclusion (years) | 4 (0, 59)                    | 3 (0, 32)                 | 0.692   |
| Disease extent/Montreal classification      |                              |                           | 0.908   |
| E1                                          | 8 (11)                       | 1 (8)                     |         |
| E2                                          | 29 (39)                      | 6 (46)                    |         |
| E3                                          | 37 (50)                      | 6 (46)                    |         |
| Severely active colitis                     | 33 (45)                      | 11 (85)                   | 0.008   |
| Hospitalisation                             | 28 (39)                      | 8 (62)                    | 0.139   |
| Active Smoking                              | 5 (7)                        | 2 (15)                    | 0.295   |
| Past smoking                                | 37 (52)                      | 6 (50)                    | 0.892   |
| Prednisolone dose (mg)                      | 50 (25, 100)                 | 50 (50, 75)               | 0.477   |
| Methyprednisolone dose (mg)                 | 40 (32, 64)                  | 72 (64, 80)               | 0.032   |
| Concomitant biologics                       | 12 (16)                      | 3 (23)                    | 0.690   |
| Concomitant immunomodulators                | 5 (7)                        | 0 (0)                     | >0.999  |
| Concomitant oral 5-ASA                      | 54 (73)                      | 9 (69)                    | 0.747   |
| Prior use of corticosteroids                | 31 (42)                      | 5 (38)                    | 0.817   |
| Hemoglobin (g/dL)                           | 13.5 (8.0, 17.3)             | 13.6 (10.4, 16.2)         | 0.808   |
| Leukocytes (10 <sup>9</sup> /L)             | 8.1 (3.8, 23.7)              | 10.4 (7.0, 19.5)          | 0.006   |
| Thrombocytes (10 <sup>9</sup> /L)           | 302 (185, 654)               | 350 (227, 568)            | 0.218   |
| C-reactive protein (mg/L)                   | 10 (0, 227)                  | 40 (7, 236)               | 0.006   |
| Albumin (g/dL)                              | 4.1 (2.1, 5.3)               | 3.9 (1.6, 4.8)            | 0.535   |
| Calprotectin (mg/kg)                        | 3516 (46, 33286)             | 8725 (1921, 43998)        | 0.062   |
| LCN-2 (ng/ml)                               | 136 (6, 719)                 | 196 (62, 4014)            | 0.059   |
| Lichtiger score                             | 10 (5, 17)                   | 14 (9, 15)                | 0.008   |

Montreal classification: E1 = proctitis, E2 = left-sided colitis, E3 = pancolitis, LCN-2 = Lipocalin-2

**Supp. Table S5.** Baseline characteristics of patients with and without severely active colitis according to Lichtiger score at baseline (n=103). Severely active colitis was defined as Lichtiger score > 10 at baseline. Data are shown as median (range) or n (%). P-values were calculated with Chi-square or Mann-Whitney U test as appropriate.

|                                             | Non-severely active colitis (n=55) | Severely active colitis (n=48) | p-value |
|---------------------------------------------|------------------------------------|--------------------------------|---------|
| Age (years)                                 | 38 (20, 82)                        | 40 (21, 75)                    | 0.854   |
| Female sex                                  | 21 (39)                            | 24 (50)                        | 0.259   |
| Body mass index                             | 24.3 (16.6, 34.2)                  | 23.4 (16.9, 36.8)              | 0.559   |
| Disease duration at study inclusion (years) | 4 (0, 37)                          | 4 (0, 59)                      | 0.399   |
| Disease extent/Montreal classification      |                                    |                                | 0.658   |
| E1                                          | 6 (11)                             | 5 (10)                         |         |
| E2                                          | 20 (37)                            | 22 (46)                        |         |
| E3                                          | 28 (52)                            | 21 (44)                        |         |
| Unknown                                     | 1                                  |                                |         |
| Hospitalisation                             | 17 (33)                            | 24 (51)                        | 0.064   |
| Active smoking                              | 4 (8)                              | 5 (11)                         | 0.732   |
| Past smoking                                | 31 (60)                            | 23 (50)                        | 0.340   |
| Prednisolone dose (mg)                      | 50 (25, 100)                       | 50 (25, 75)                    | 0.075   |
| Methyprednisolone dose (mg)                 | 40 (32, 64)                        | 48 (40, 80)                    | 0.052   |
| Concomitant biologics                       | 7 (13)                             | 11 (23)                        | 0.174   |
| Concomitant immunomodulators                | 3 (6)                              | 4 (8)                          | 0.702   |
| Concomitant oral 5-ASA                      | 41 (75)                            | 35 (73)                        | 0.851   |
| Prior use of corticosteroids                | 22 (40)                            | 23 (48)                        | 0.419   |
| Hemoglobin (g/dL)                           | 13.7 (8.8, 17.3)                   | 13.3 (8.0, 16.2)               | 0.118   |
| Leukocytes (10 <sup>9</sup> /L)             | 7.1 (4.5, 18.6)                    | 8.9 (3.8, 23.7)                | 0.006   |
| Thrombocytes (10 <sup>9</sup> /L)           | 287 (185, 785)                     | 318 (219, 613)                 | 0.035   |
| C-reactive protein (mg/L)                   | 8 (1, 156)                         | 25 (0, 236)                    | 0.041   |
| Albumin (g/dL)                              | 4.1 (3.0, 5.3)                     | 3.9 (1.6, 5.0)                 | 0.055   |
| Calprotectin (mg/kg)                        | 2999 (8, 33550)                    | 6029 (46, 43998)               | 0.007   |
| LCN-2 (ng/ml)                               | 121 (9, 1636)                      | 169 (6, 4014)                  | 0.080   |
| Lichtiger score                             | 9 (5, 10)                          | 13 (11, 17)                    | <0.001  |

Montreal classification: E1 = proctitis, E2 = left-sided colitis, E3 = pancolitis, LCN-2 = Lipocalin-2

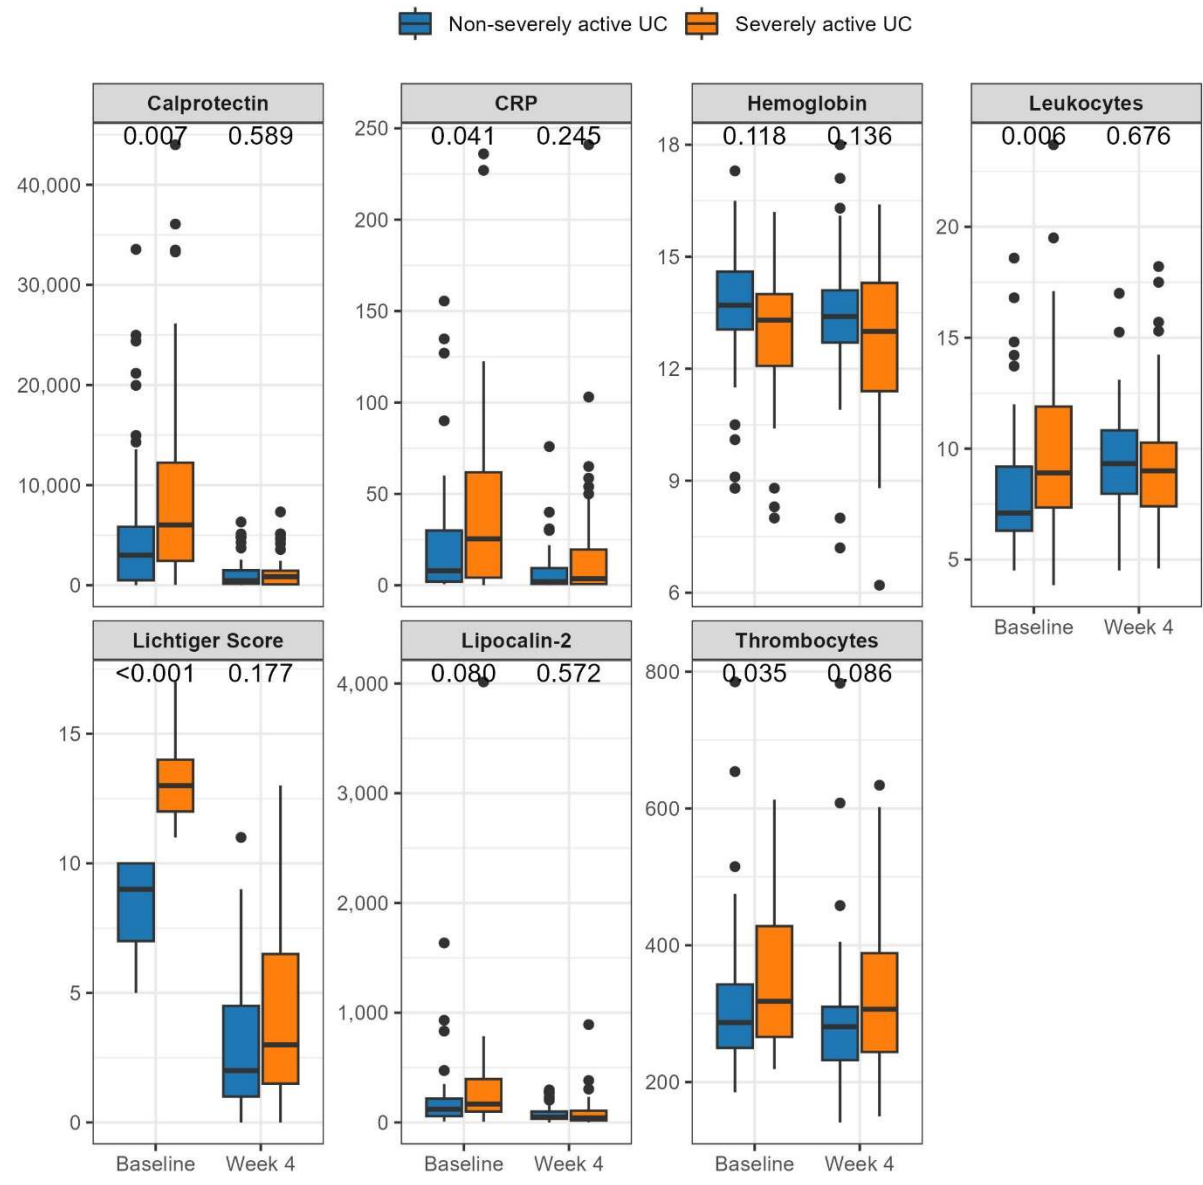

**Supp. Figure S3.** Boxplots for changes of Lichtiger Score and biochemical parameter from baseline to week 4 (n=103) divided into patients with and without severely active according to Lichtiger Score at baseline. Severely active colitis was defined as Lichtiger score > 10 at baseline. The Mann Whitney U test was used for comparisons between the groups and according p-values are provided.

**Supp. Table S6.** Baseline characteristics concerning biologic experienced and biologic naïve patients (n=103). Biologic experienced patients were defined as patients with prior or ongoing biologic therapy. Data are shown as median (range) or n (%). P-values were calculated with Chi-square or Mann-Whitney U test as appropriate.

|                                             | Biologic experienced (n=28) | Bio-naïve (n=75)   | p-value |
|---------------------------------------------|-----------------------------|--------------------|---------|
| Age (years)                                 | 38 (31, 55)                 | 41 (31, 58)        | 0.750   |
| Female sex                                  | 17 (61)                     | 28 (38)            | 0.038   |
| Body mass index                             | 23.3 (20.7, 27.5)           | 23.9 (21.9, 26.2)  | 0.646   |
| Disease duration at study inclusion (years) | 9 (5, 16)                   | 2 (0, 10)          | 0.003   |
| Disease extent/Montreal classification      |                             |                    | 0.410   |
| E1                                          | 1 (4)                       | 10 (14)            |         |
| E2                                          | 13 (46)                     | 29 (39)            |         |
| E3                                          | 14 (50)                     | 35 (47)            |         |
| Unknown                                     | 1                           |                    |         |
| Hospitalisation                             | 12 (46)                     | 29 (40)            | 0.568   |
| Active smoking                              | 4 (15)                      | 5 (6.9)            | 0.251   |
| Past smoking                                | 14 (54)                     | 40 (56)            | 0.881   |
| Prednisolone dose (mg)                      | 50 (50, 50)                 | 50 (50, 50)        | 0.216   |
| Methylprednisolone dose (mg)                | 40 (40, 54)                 | 48 (44, 64)        | 0.156   |
| Concomitant biologics                       | 18 (64)                     | 0 (0)              | <0.001  |
| Concomitant immunomodulators                | 2 (7)                       | 5 (7)              | >0.999  |
| Concomitant oral 5-ASA                      | 23 (82)                     | 53 (71)            | 0.239   |
| Prior use of corticosteroids                | 22 (79)                     | 23 (31)            | <0.001  |
| Hemoglobin (g/dL)                           | 13.4 (11.8, 14.5)           | 13.6 (13.1, 14.6)  | 0.377   |
| Leukocytes (10 <sup>9</sup> /L)             | 7.8 (6.5, 8.8)              | 8.6 (6.8, 10.2)    | 0.341   |
| Thrombocytes (10 <sup>9</sup> /L)           | 299 (262, 358)              | 303 (253, 400)     | 0.864   |
| C-reactive protein (mg/L)                   | 8 (2, 20)                   | 16 (3, 43)         | 0.160   |
| Albumin (g/dL)                              | 4.1 (3.5, 4.5)              | 4.1 (3.8, 4.4)     | 0.933   |
| Calprotectin (mg/kg)                        | 2899 (1446, 10458)          | 4,310 (1870, 9998) | 0.578   |
| LCN-2 (ng/ml)                               | 132 (69, 258)               | 164 (68, 275)      | 0.970   |
| Lichtiger score                             | 11 (9, 13)                  | 10 (9, 13)         | 0.652   |

Montreal classification: E1 = proctitis, E2 = left-sided colitis, E3 = pancolitis, LCN-2 = Lipocalin-2

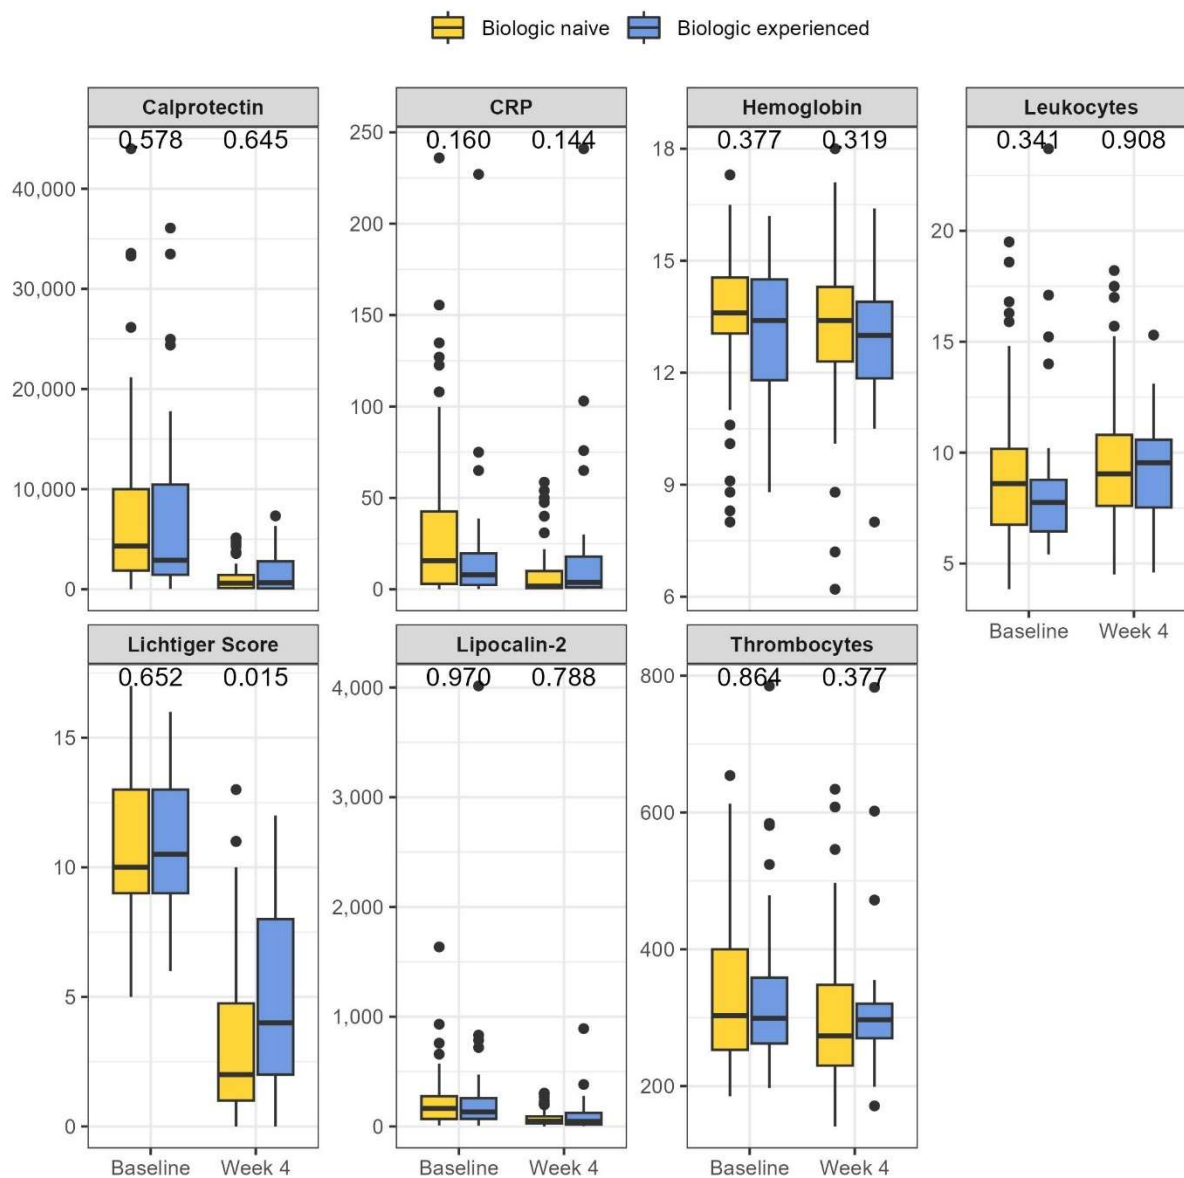

**Supp. Figure S4.** Boxplots for changes of Lichtiger Score and biomarkers from baseline to week 4 (n=103) divided into biologic naïve (n=28) and biologic experienced (n=75) patients. Biologic experienced patients were defined as patients with prior or ongoing biologic therapy. The Mann-Whitney-U test was used for comparisons between the groups and according p-values are provided.

**Supp. Table S7.** Logistic regression analysis for Lichtiger non-response. The multivariable analysis includes variables of the univariable analysis with a p-value < 0.2. CRP, calprotectin, LCN-2 and thrombocytes were analyzed with logarithmic scores.

| Characteristic                          | N   | univariable     |                     |         | multivariable   |                     |         | VIF <sup>1</sup> |
|-----------------------------------------|-----|-----------------|---------------------|---------|-----------------|---------------------|---------|------------------|
|                                         |     | OR <sup>1</sup> | 95% CI <sup>1</sup> | p-value | OR <sup>1</sup> | 95% CI <sup>1</sup> | p-value |                  |
| Age (years)                             | 102 | 1.01            | 0.98, 1.04          | 0.475   |                 |                     |         |                  |
| Sex                                     | 102 |                 |                     | 0.875   |                 |                     |         |                  |
| m                                       |     | —               | —                   |         |                 |                     |         |                  |
| w                                       |     | 0.93            | 0.38, 2.23          |         |                 |                     |         |                  |
| Smoking in the past                     | 98  |                 |                     | 0.004   |                 |                     | 0.003   | 1.1              |
| No                                      |     | —               | —                   |         | —               | —                   |         |                  |
| Yes                                     |     | 4.03            | 1.53, 12.1          |         | 5.38            | 1.71, 20.1          |         |                  |
| Active Smoking                          | 99  |                 |                     | 0.277   |                 |                     |         |                  |
| No                                      |     | —               | —                   |         |                 |                     |         |                  |
| Yes                                     |     | 2.20            | 0.51, 8.99          |         |                 |                     |         |                  |
| Hospitalisation                         | 99  |                 |                     | 0.855   |                 |                     |         |                  |
| No                                      |     | —               | —                   |         |                 |                     |         |                  |
| Yes                                     |     | 1.09            | 0.44, 2.63          |         |                 |                     |         |                  |
| Years from diagnosis to study inclusion | 101 | 1.01            | 0.97, 1.05          | 0.671   |                 |                     |         |                  |
| Disease extention                       | 102 |                 |                     | 0.333   |                 |                     |         |                  |
| Left-sided colitis                      |     | —               | —                   |         |                 |                     |         |                  |
| Pancolitis                              |     | 2.06            | 0.79, 5.69          |         |                 |                     |         |                  |
| Proctitis                               |     | 1.59            | 0.30, 7.06          |         |                 |                     |         |                  |
| Concomitant immunomodulators            | 103 |                 |                     | 0.355   |                 |                     |         |                  |
| No                                      |     | —               | —                   |         |                 |                     |         |                  |
| Yes                                     |     | 2.13            | 0.40, 10.3          |         |                 |                     |         |                  |
| Prior use of corticosteroids            | 103 |                 |                     | 0.732   |                 |                     |         |                  |
| No                                      |     | —               | —                   |         |                 |                     |         |                  |
| Yes                                     |     | 1.16            | 0.48, 2.79          |         |                 |                     |         |                  |
| Biologics experienced                   | 103 |                 |                     | 0.099   |                 |                     | 0.091   | 1.1              |
| No                                      |     | —               | —                   |         | —               | —                   |         |                  |
| Yes                                     |     | 2.21            | 0.86, 5.61          |         | 2.81            | 0.85, 9.71          |         |                  |
| BMI                                     | 98  | 1.11            | 0.99, 1.24          | 0.069   | 1.13            | 0.98, 1.31          | 0.087   | 1.1              |
| Hemoglobin                              | 97  | 0.76            | 0.59, 0.97          | 0.026   | 0.76            | 0.57, 0.99          | 0.045   | 1.1              |
| Leukocytes                              | 97  | 0.96            | 0.83, 1.09          | 0.570   |                 |                     |         |                  |
| Thrombocytes                            | 95  | 1.53            | 0.34, 6.59          | 0.572   |                 |                     |         |                  |
| CRP                                     | 97  | 1.14            | 0.87, 1.52          | 0.338   |                 |                     |         |                  |
| Albumin                                 | 74  | 0.83            | 0.39, 1.82          | 0.640   |                 |                     |         |                  |
| Calprotectin                            | 95  | 1.25            | 0.93, 1.74          | 0.139   | 1.07            | 0.73, 1.61          | 0.720   | 1.2              |
| Lipocalin-2                             | 95  | 1.18            | 0.81, 1.77          | 0.389   |                 |                     |         |                  |
| Severely active colitis                 | 103 |                 |                     | 0.641   |                 |                     |         |                  |
| no                                      |     | —               | —                   |         |                 |                     |         |                  |
| yes                                     |     | 0.81            | 0.33, 1.94          |         |                 |                     |         |                  |

<sup>1</sup>OR = odds Ratio, CI = confidence interval, VIF = variance inflation factor, CRP = C-reactive protein, BMI = body mass index

**Supp. Table S8.** Logistic regression analysis for combined non-response. The multivariable analysis includes variables of the univariable analysis with a p-value < 0.2. CRP, calprotectin, LCN-2 and thrombocytes were analyzed with logarithmic scores.

| Characteristic                          | N  | univariable     |                     |         | multivariable   |                     |         |                  |
|-----------------------------------------|----|-----------------|---------------------|---------|-----------------|---------------------|---------|------------------|
|                                         |    | OR <sup>1</sup> | 95% CI <sup>1</sup> | p-value | OR <sup>1</sup> | 95% CI <sup>1</sup> | p-value | VIF <sup>1</sup> |
| Age (years)                             | 98 | 1.01            | 0.98, 1.04          | 0.501   |                 |                     |         |                  |
| Sex                                     | 98 |                 |                     | 0.651   |                 |                     |         |                  |
| m                                       |    | —               | —                   |         |                 |                     |         |                  |
| w                                       |    | 0.82            | 0.34, 1.92          |         |                 |                     |         |                  |
| Smoking in the past                     | 95 |                 |                     | 0.075   |                 |                     | 0.050   | 1.0              |
| No                                      |    | —               | —                   |         | —               | —                   |         |                  |
| Yes                                     |    | 2.26            | 0.92, 5.89          |         | 2.80            | 1.00, 8.58          |         |                  |
| Active Smoking                          | 96 |                 |                     | 0.424   |                 |                     |         |                  |
| No                                      |    | —               | —                   |         |                 |                     |         |                  |
| Yes                                     |    | 1.78            | 0.41, 7.23          |         |                 |                     |         |                  |
| Hospitalisation                         | 96 |                 |                     | 0.971   |                 |                     |         |                  |
| No                                      |    | —               | —                   |         |                 |                     |         |                  |
| Yes                                     |    | 1.02            | 0.42, 2.41          |         |                 |                     |         |                  |
| Years from diagnosis to study inclusion | 97 | 1.00            | 0.96, 1.04          | 0.937   |                 |                     |         |                  |
| Disease extention                       | 98 |                 |                     | 0.407   |                 |                     |         |                  |
| Left-sided colitis                      |    | —               | —                   |         |                 |                     |         |                  |
| Pancolitis                              |    | 1.86            | 0.75, 4.81          |         |                 |                     |         |                  |
| Proctitis                               |    | 1.55            | 0.29, 7.11          |         |                 |                     |         |                  |
| Concomitant immunomodulators            | 99 |                 |                     | 0.161   |                 |                     | 0.128   | 1.1              |
| No                                      |    | —               | —                   |         | —               | —                   |         |                  |
| Yes                                     |    | 3.05            | 0.63, 16.3          |         | 4.36            | 0.64, 30.5          |         |                  |
| Prior use of corticosteroids            | 99 |                 |                     | 0.634   |                 |                     |         |                  |
| No                                      |    | —               | —                   |         |                 |                     |         |                  |
| Yes                                     |    | 1.23            | 0.52, 2.88          |         |                 |                     |         |                  |
| Biologics experienced                   | 99 |                 |                     | 0.020   |                 |                     | 0.036   | 1.1              |
| No                                      |    | —               | —                   |         | —               | —                   |         |                  |
| Yes                                     |    | 2.94            | 1.18, 7.44          |         | 3.30            | 1.08, 10.6          |         |                  |
| BMI                                     | 94 | 1.11            | 1.00, 1.24          | 0.054   | 1.12            | 0.99, 1.28          | 0.078   | 1.0              |
| Hemoglobin                              | 94 | 0.79            | 0.62, 1.00          | 0.052   | 0.75            | 0.57, 0.97          | 0.029   | 1.1              |
| Leukocytes                              | 94 | 0.92            | 0.80, 1.05          | 0.235   |                 |                     |         |                  |
| Thrombocytes                            | 92 | 0.89            | 0.20, 3.69          | 0.872   |                 |                     |         |                  |
| CRP                                     | 94 | 1.00            | 0.77, 1.30          | >0.999  |                 |                     |         |                  |
| Albumin                                 | 71 | 1.18            | 0.57, 2.62          | 0.664   |                 |                     |         |                  |
| Calprotectin                            | 92 | 1.06            | 0.81, 1.41          | 0.684   |                 |                     |         |                  |
| Lipocalin-2                             | 92 | 0.96            | 0.65, 1.41          | 0.823   |                 |                     |         |                  |
| Severely active colitis                 | 99 |                 |                     | 0.344   |                 |                     |         |                  |
| no                                      |    | —               | —                   |         |                 |                     |         |                  |
| yes                                     |    | 0.66            | 0.28, 1.55          |         |                 |                     |         |                  |

<sup>1</sup>OR = odds ratio, CI = confidence interval, VIF = variance inflation factor, CRP = C-reactive protein, BMI = body mass index
